# Supplementary material for: A simple bridging flocculation assay for rapid, sensitive and stringent detection of gene specific DNA methylation
Source: PubMed Central journal article supplement (PMC4602207; doi:10.1038/srep15028), 2015-10-13
Supplement: srep15028-s1.pdf [file srep15028-s1.pdf]

Supplemental Data for

# A simple bridging flocculation assay for rapid, sensitive and stringent detection of gene specific DNA methylation

Eugene J. H. Wee<sup>1,\*</sup>, Thu Ha Ngo<sup>1,2</sup> and Matt Trau<sup>1,2,\*</sup>

| Gene Target | Fwd                    | Rev                   | Genome Coordinates UCSC HG19 |
|-------------|------------------------|-----------------------|------------------------------|
| ESR1        | CCTGGGACTGCACTTGCT     | AGGGCAGAAGGCTCAGAAAC  | chr6: 152128837-152129008    |
| NPY         | AGCAGATATGGAGGGGAGAACC | AGAGATTTGGAGCCCAAGAA  | chr7: 24324159-24324352      |
| GSTP1       | GGCTCCAGCAAACCTTTTCTTT | GATAAGGGGGTTCCGGATCTC | chr11: 67351573-67351733     |

Table S1: Primers used for quantitative PCR (qPCR) validation of MBD enrichment.

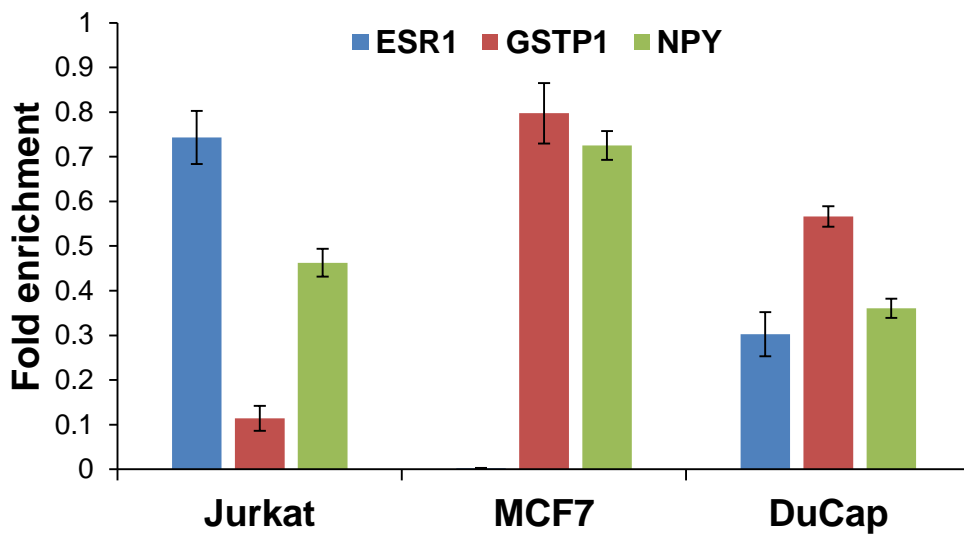

**Figure S1.** qPCR validation of methylation states in Jurkat, MCF7, and DuCap cell lines for the ESR1 (blue), GSTP1 (red) and NPY (green). Error bars represent standard deviation of 4 biological replicates. qPCR was performed using Kapa2G Fast Hotstart Readymix (KapaBiosciences) supplemented with 250nM of each primer, 1  $\mu$ L of DNA from either the MBD captured fraction or MBD input. Thermo-cycling was done on the ABI 7500 Fast Real Time PCR platform (Applied Biosystems) with the following program: 95°C for 2 minutes followed by 35 cycles of 95°C for 15s, 60°C for 30s and 72°C for 30s. Fold Enrichment was estimated by following formula:

$$\begin{aligned}
 \text{Enrichment} &= \text{MBD} \div \text{input} \\
 &= 2^{-Ct_{\text{MBD}}} \div 2^{-Ct_{\text{input}}} \\
 &= 2^{-(Ct_{\text{MBD}} - Ct_{\text{input}})}
 \end{aligned}$$

Where Ct is the cycle threshold.

| Gene Target | Fwd                        | Rev                              | Genome Coordinates UCSC HG19 |
|-------------|----------------------------|----------------------------------|------------------------------|
| ESR1        | GTTYGTTTTGGGATTGTATTTGTTTT | AAATACTTTAATATAAAAAATCATAATCATAA | chr6: 152128835-152129077    |
| NPY         | TTTTAGTAGATATGGAGGGAGAAT T | AAACCCAAAAATCCAAAAAATAACA        | chr7: 24324155-24324343      |
| GSTP        | GTTGGGGTTGTAGTTTATAGTTTTT  | AATTCCTCCAAAAATTTACACAA          | chr11: 67351678-67351835     |

**Table S2: Primers used for bisulfite sequencing.**

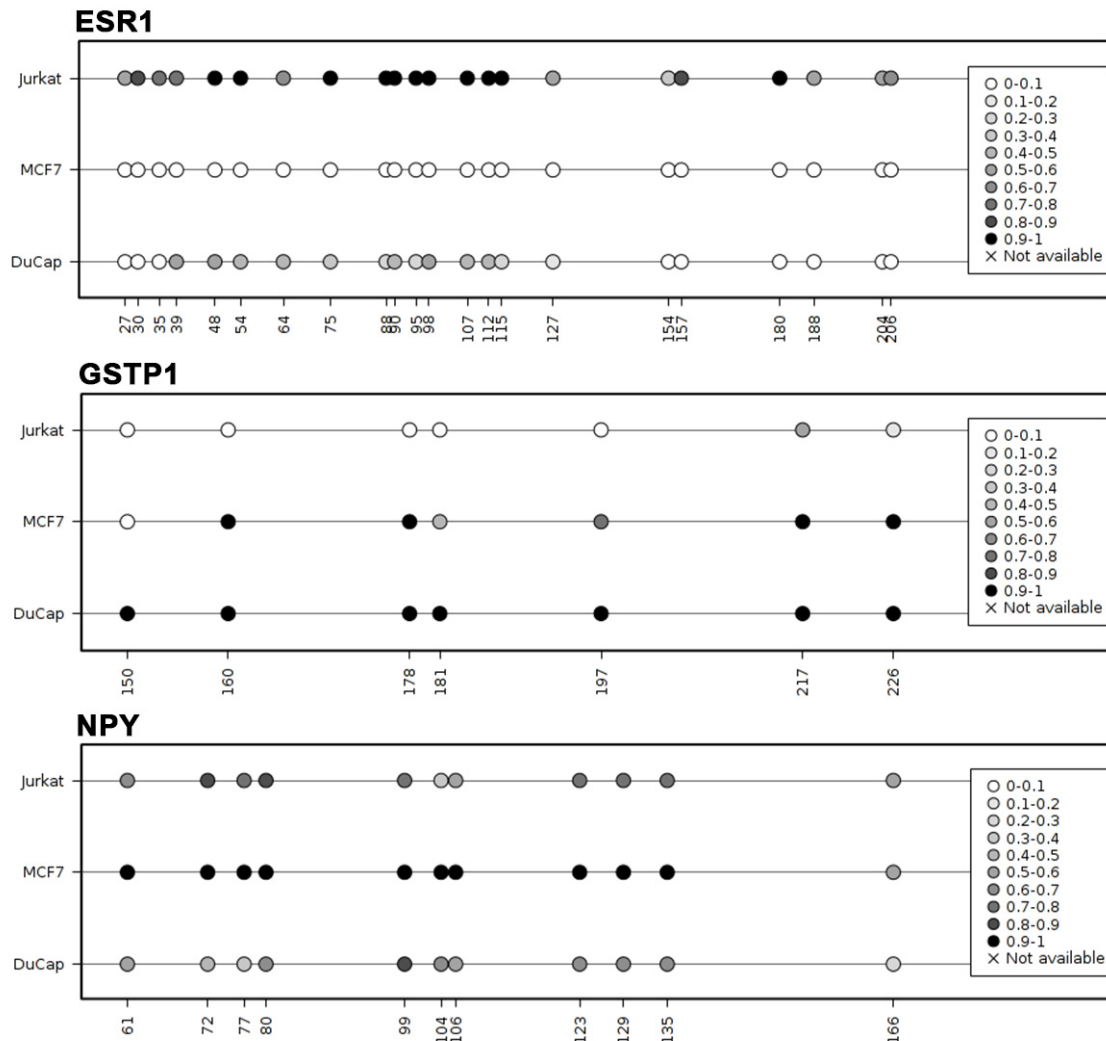

**Figure S2.** Bisulfite sequencing of Jurkat, MCF7, and DuCap cell lines for the ESR1, GSTP1 and NPY. Individual CpGs are represented by circles and methylation levels are indicated by the degree of shading. Numbers below each circle is the nucleotide position in the respective RPA amplicons described in the main text.
